# Supplementary material for: Enhanced Catalytic Activity in the Oxidative Synthesis of Benzoxazoles by Tuning Local Electron Charge Densities in N-doped sp3@sp2 Hybrid Nanodiamond
Source: Research Square preprint supplement (doi:10.21203/rs.3.rs-515078/v1), 2021-05-17
Supplement: Supplementary file 1 [file 25f67c534a301ee7b6a68081.pdf]

**Table 1** Substrate scope for aerobic synthesis of 2-substituted benzoxazoles, benzothiazoles and benzimidazoles

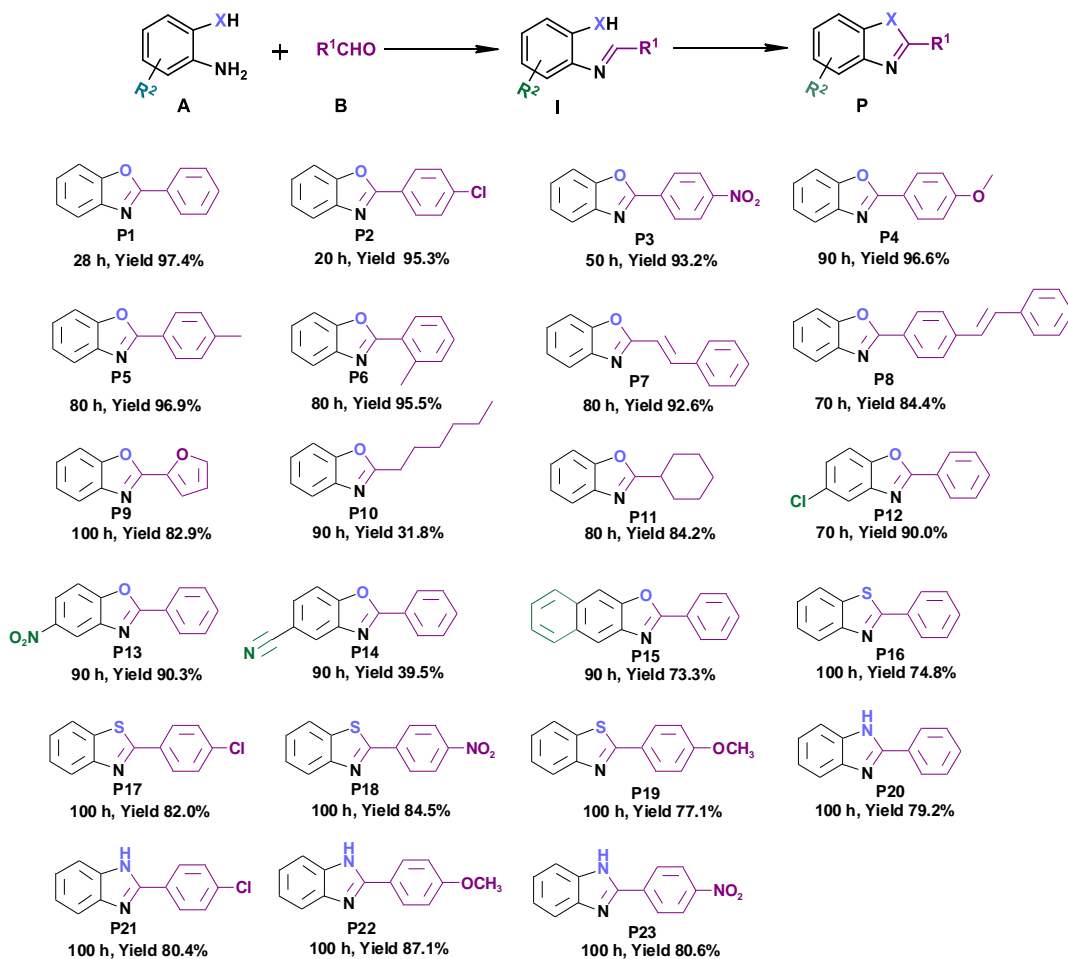

**Reaction Conditions:** 2 mmol aminophenol, 2.2 mmol benzaldehyde, 10 mL xylene, 120 mg catalyst (NC@ND-900), 140 °C, 1 atm O<sub>2</sub>; Yield of isolated product obtained after recrystallization. The structures of all products were identified by the GC-MS (Fig. S13).
